# Supplementary material for: A Prognostic Nomogram Combining Gene Expression Profiles and TNM Stage Predicts Survival in Gastric Cancer
Source: Research Square preprint supplement (doi:10.21203/rs.3.rs-764284/v1), 2021-08-09
Supplement: Supplementary file 1 [file d416b1d9f5ae420bbb3b24d7.docx]

Supplementary Table 1 Candidate mRNAs significantly associated with the OS of TCGA -STAD Project patients. Abbreviations: HR, hazard ratio; CI, confidence interval.

Supplementary Table 2 Univariate and multivariate Cox proportional hazards regression analysis of five-mRNA signature and clinical risk factors in the GSE62254 dataset. Abbreviations: HR, hazard ratio; CI, confidence interval.
